# Supplementary material
Source: bioRxiv or medRxiv preprint supplement (https://www.biorxiv.org/highwire/filestream/108521/field_highwire_adjunct_files/5/358622-5.pdf)

time after plating on MEA plate

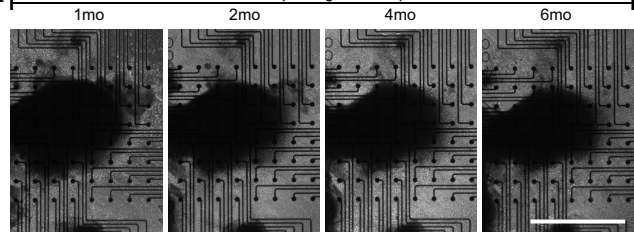

**B** criteria definition of MEA parameter

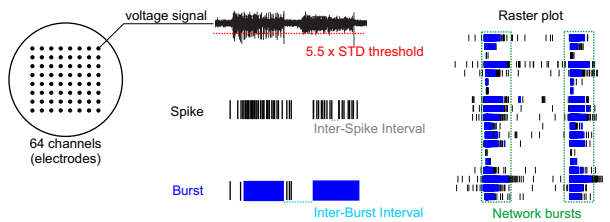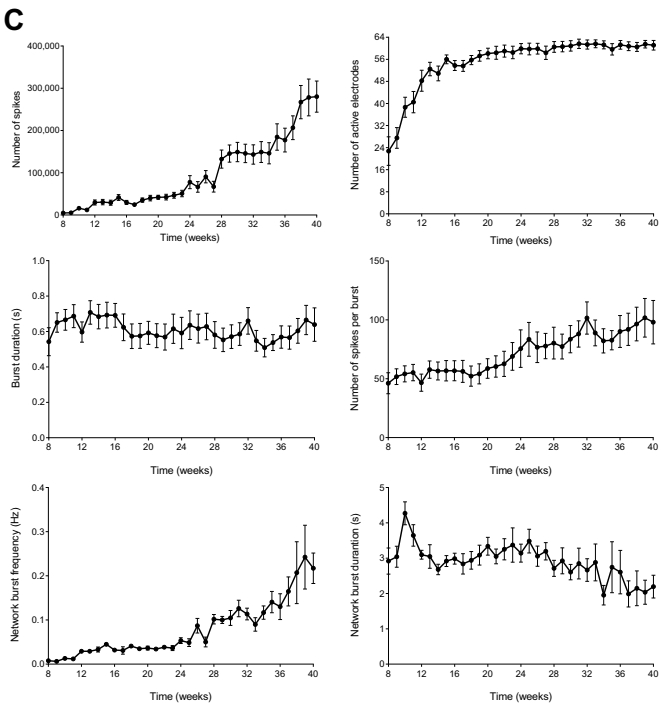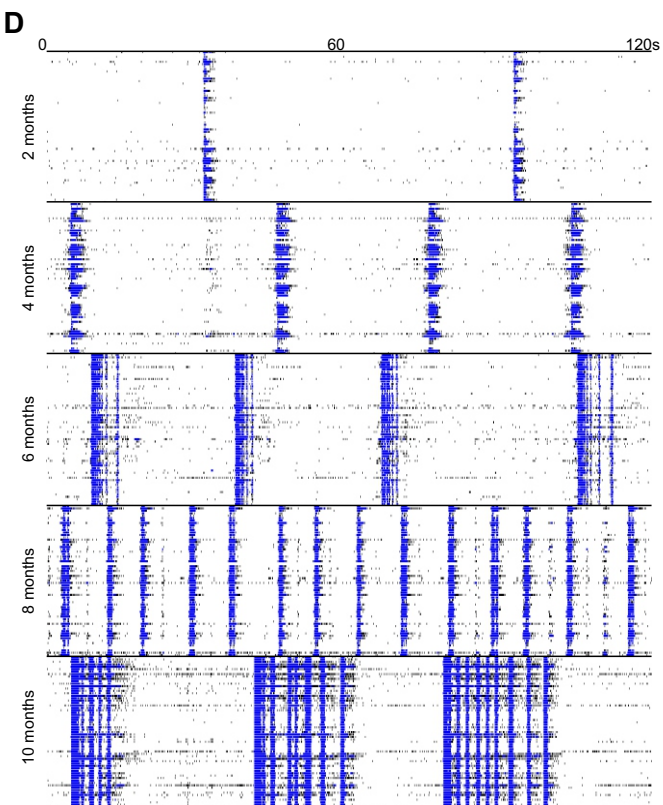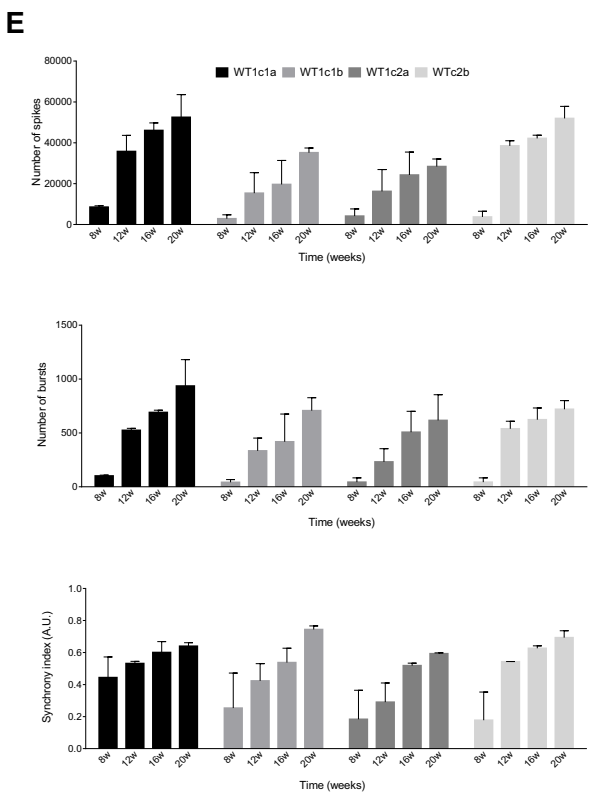

Supplement: Supplementary file [file 358622-5.pdf]
